# Supplementary material
Source: PubMed Central journal article supplement (PMC5812748)
Supplement: mmc1.pdf [file mmc1.pdf]

# Analgo-sedation Practices and the Impact of Sedation Depth on Clinical Outcomes Among Patients Requiring Mechanical Ventilation in the ED

## A Cohort Study

*Robert J. Stephens, BS; Enyo Ablordeppey, MD, MPH; Anne M. Drewry, MD; Christopher Palmer, MD; Brian T. Wessman, MD; Nicholas M. Mohr, MD; Brian W. Roberts, MD; Stephen Y. Liang, MD, MPHS; Marin H. Kollef, MD; and Brian M. Fuller, MD*

CHEST 2017; 152(5):963-971

**e-Table 1.** Medications used for endotracheal intubation in the emergency department

| Medication                   | All Subjects <sup>a</sup><br>n = 317 | Mortality Status         |                       |          |
|------------------------------|--------------------------------------|--------------------------|-----------------------|----------|
|                              |                                      | Non-survivors<br>(n= 46) | Survivors<br>(n= 271) | <i>p</i> |
| Neuromuscular blocker, n (%) | 202 (63.7)                           | 27 (58.7)                | 175 (64.6)            | 0.443    |
| Succinylcholine              | 79 (24.9)                            | 12 (26.1)                | 67 (24.7)             | 0.843    |
| Rocuronium                   | 36 (11.4)                            | 7 (15.2)                 | 29 (10.7)             | 0.372    |
| None                         |                                      |                          |                       |          |
| Induction agent              |                                      |                          |                       |          |
| Etomidate                    | 166 (52.4)                           | 19 (41.3)                | 147 (54.2)            | 0.104    |
| Ketamine                     | 114 (36.0)                           | 18 (39.1)                | 96 (35.4)             | 0.628    |
| Propofol                     | 9 (2.8)                              | 1 (2.2)                  | 8 (3.0)               | 0.769    |
| Midazolam                    | 6 (1.9)                              | 1 (2.2)                  | 5 (1.8)               | 0.880    |
| Ketamine/Propofol            | 5 (1.6)                              | 1 (2.2)                  | 4 (1.5)               | 0.725    |
| None                         | 17 (5.3)                             | 6 (13.0)                 | 11 (4.1)              | 0.012    |

<sup>a</sup>317 included patients were intubated in the emergency department.

45 patients were intubated pre-hospital (7 were given a neuromuscular blocker and 5 were given an induction agent).

52 patients were intubated at an outside hospital prior to transfer (6 were given a neuromuscular blocker and 2 were given an induction agent).

**e-Table 2.** Sedation variables in the intensive care unit during the first 48 hours of admission

| Drug                                 | All Subjects<br>n = 414 | Mortality Status         |                       | p      |
|--------------------------------------|-------------------------|--------------------------|-----------------------|--------|
|                                      |                         | Non-survivors<br>(n= 60) | Survivors<br>(n= 354) |        |
| Fentanyl                             |                         |                          |                       |        |
| n (%)                                | 370 (89.4)              | 48 (80.0)                | 322 (91.0)            | 0.011  |
| Cumulative dose (mcg)                | 2532 (1406 - 4758)      | 2540 (1407 - 4035)       | 2532 (1404 - 4808)    | 0.877  |
| Weight-based dose (mcg/kg)           | 32.3 (17.4 - 60.0)      | 33.0 (20.0 - 52.2)       | 32.3 (17.2 - 60.1)    | 0.898  |
| Propofol                             |                         |                          |                       |        |
| n (%)                                | 259 (62.6)              | 27 (45.0)                | 232 (65.5)            | 0.002  |
| Cumulative dose (mg)                 | 2374 (593 - 5809)       | 2115 (264 - 5251)        | 2413 (712 - 5813)     | 0.450  |
| Weight-based dose (mg/kg)            | 31 (7- 67)              | 24 (4 - 68)              | 31 (7 - 66)           | 0.481  |
| Midazolam                            |                         |                          |                       |        |
| n (%)                                | 212 (51.2)              | 37 (61.7)                | 175 (49.4)            | 0.080  |
| Cumulative dose (mg)                 | 9.7 (4.0 - 48.2)        | 6.0 (4.0 - 34.9)         | 10.0 (4.0 - 51.6)     | 0.436  |
| Weight-based dose (mg/kg)            | 0.14 (0.05 - 0.59)      | 0.08 (0.04 - 0.57)       | 0.16 (0.05 - 0.59)    | 0.450  |
| Dexmedetomidine                      |                         |                          |                       |        |
| n (%)                                | 131 (31.6)              | 4 (6.7)                  | 127 (35.9)            | <0.001 |
| Cumulative dose (mcg)                | 438 (148 - 1089)        | 207 (69 - 665)           | 444 (152 - 1104)      | 0.239  |
| Weight-based dose (mcg/kg)           | 5.7 (2.1 - 11.9)        | 2.3 (0.7 - 5.5)          | 5.9 (2.2 - 12.4)      | 0.111  |
| Lorazepam                            |                         |                          |                       |        |
| n (%)                                | 39 (9.4)                | 6 (10.0)                 | 33 (9.3)              | 0.868  |
| Cumulative dose (mg)                 | 2.0 (2.0 - 4.0)         | 4.0 (3.1 - 10.0)         | 2.0 (2.0 - 4.0)       | 0.212  |
| Weight-based dose (mg/kg)            | 0.03 (0.02 - 0.08)      | 0.04 (0.03 - 0.14)       | 0.03 (0.02 - 0.07)    | 0.293  |
| Hydromorphone                        |                         |                          |                       |        |
| n (%)                                | 33 (8.0)                | 2 (3.3)                  | 31 (8.8)              | 0.151  |
| Cumulative dose (mg)                 | 0.8 (0.5 - 1.4)         | 1.5 (1.0 - NA)           | 0.8 (0.4 - 1.3)       | 0.341  |
| Weight-based dose (mg/kg)            | 0.01 (0.01 - 0.02)      | 0.02 (0.01 - NA)         | 0.01 (0.004 - 0.02)   | 0.500  |
| Oxycodone                            |                         |                          |                       |        |
| n (%)                                | 24 (5.8)                | 2 (3.3)                  | 22 (6.2)              | 0.377  |
| Cumulative dose (mg)                 | 10.0 (6.3 - 28.8)       | 12.5 (10.0 - NA)         | 10.0 (5.0 - 35.0)     | 1.0    |
| Weight-based dose (mg/kg)            | 0.15 (0.09 - 0.39)      | 0.15 (0.13 - NA)         | 0.14 (0.08 - 0.4)     | 0.877  |
| Morphine                             |                         |                          |                       |        |
| n (%)                                | 10 (2.4)                | 5 (8.3)                  | 5 (1.4)               | 0.001  |
| Cumulative dose (mg)                 | 5.0 (2.0 - 16.9)        | 10.0 (2.5 -18.8)         | 4.0 (2.0 - 57.8)      | 0.690  |
| Weight-based dose (mg/kg)            | 0.06 (0.03 - 0.23)      | 0.11 (0.04 - 0.24)       | 0.06 (0.03 - 0.57)    | 0.690  |
| Haloperidol                          |                         |                          |                       |        |
| n (%)                                | 12 (2.9)                | 0 (0)                    | 12 (3.4)              | 0.148  |
| Cumulative dose (mg)                 | 15 (6 - 24)             | NA                       | 15 (6 - 24)           | NA     |
| Weight-based dose (mg/kg)            | 0.15 (0.09-0.24)        | NA                       | 0.15 (0.09-0.24)      | NA     |
| Quetiapine                           |                         |                          |                       |        |
| n (%)                                | 12 (2.9)                | 1 (1.7)                  | 11 (3.1)              | 0.538  |
| Cumulative dose (mg)                 | 75 (25 - 175)           | 25                       | 100 (25 - 200)        | 0.333  |
| Weight-based dose (mg/kg)            | 1.2 (0.36 - 2.4)        | 0.297                    | 1.6 (0.4 - 2.5)       | 0.333  |
| ICU RASS first 24 Hours <sup>a</sup> | -3 (-4 to -2)           | -4 (-5 to -3)            | -3 (-3 to -2)         | <0.001 |
| ICU RASS first 48 Hours <sup>b</sup> | -2 (-3 to -1)           | -4 (-5 to -3)            | -2 (-3 to -1)         | <0.001 |

ICU=intensive care unit, RASS=Richmond Agitation-Sedation Scale.

<sup>a</sup> Based on 6122 RASS measurements collected in the first 24 hours. Median of 15 (IQR 11-19) observations per patient in this time period.

<sup>b</sup> Based on 12622 RASS measurements collected in the first 48 hours. Median of 30 (IQR 23-39) observations per patient in this time period.

**e-Table 3.** Secondary outcomes according to deep sedation in the emergency department. Deep sedation was defined as a Richmond Agitation-Sedation Scale of -3 to -5.

| Secondary Outcome (days) | Deep Sedation (n= 244) | No deep sedation (n= 137) | Between-Group Difference | 95% CI       | <i>p</i> |
|--------------------------|------------------------|---------------------------|--------------------------|--------------|----------|
| Ventilator-free          | 18.2 (10.3)            | 21.8 (7.9)                | -3.6                     | -5.4 to -1.7 | < 0.001  |
| ICU-free                 | 16.1 (10.0)            | 19.4 (7.8)                | -3.3                     | -5.1 to -1.5 | < 0.001  |
| Hospital-free            | 11.9 (9.4)             | 14.5 (8.4)                | -2.6                     | -4.5 to -0.8 | 0.005    |

ICU=intensive care unit, CI=confidence interval.

**e-Table 4.** Multivariable logistic regression models for subgroup analyses with survival to hospital discharge as the dependent variable.

| Variables                                                      | aOR  | 95% CI      | Standard Error | p      |
|----------------------------------------------------------------|------|-------------|----------------|--------|
| <b>Trauma patients (n=128)</b>                                 |      |             |                |        |
| Age                                                            | 1.05 | 1.01 - 1.08 | 0.02           | 0.011  |
| Vasopressor infusion                                           | 9.43 | 2.31 - 38.6 | 0.72           | 0.002  |
| Race                                                           | 0.42 | 0.09 - 1.88 | 0.77           | 0.254  |
| ED SOFA                                                        | 1.03 | 0.74 - 1.43 | 0.17           | 0.867  |
| ED RASS level                                                  | 0.39 | 0.20 - 0.78 | 0.35           | 0.007  |
| <b>Medical patients (n= 286)</b>                               |      |             |                |        |
| Age                                                            | 1.02 | 0.99 - 1.04 | 0.01           | 0.191  |
| ED SOFA                                                        | 1.31 | 1.16 - 1.48 | 0.06           | <0.001 |
| Malignancy                                                     | 2.60 | 1.13 - 6.00 | 0.43           | 0.025  |
| Sepsis                                                         | 1.12 | 0.47 - 2.70 | 0.45           | 0.799  |
| ED RASS level                                                  | 0.79 | 0.63 - 0.99 | 0.12           | 0.045  |
| <b>Patients given analgo-sedation in ED (n= 382)</b>           |      |             |                |        |
| Age                                                            | 1.02 | 0.99 - 1.04 | 0.01           | 0.140  |
| Vasopressor infusion                                           | 2.48 | 1.08 - 5.72 | 0.43           | 0.033  |
| Malignancy                                                     | 2.23 | 0.94 - 5.27 | 0.44           | 0.069  |
| Immunosuppression                                              | 1.50 | 0.55 - 4.11 | 0.51           | 0.426  |
| ED SOFA                                                        | 1.11 | 0.98 - 1.27 | 0.07           | 0.098  |
| Reason for mechanical ventilation                              |      |             |                |        |
| COPD                                                           | 2.25 | 0.55 - 9.29 | 0.72           | 0.261  |
| Sepsis                                                         | 0.76 | 0.30 - 1.88 | 0.47           | 0.547  |
| Trauma                                                         | 1.75 | 0.74 - 4.15 | 0.44           | 0.204  |
| ED RASS level                                                  | 0.77 | 0.62 - 0.95 | 0.11           | 0.014  |
| ICU dexmedetomidine use                                        | 0.19 | 0.06 - 0.54 | 0.55           | 0.002  |
| <b>Patients given dexmedetomidine in ICU excluded (n= 283)</b> |      |             |                |        |
| Age                                                            | 1.02 | 1.00 - 1.04 | 0.01           | 0.043  |
| Vasopressor infusion                                           | 3.09 | 1.30 - 7.35 | 0.44           | 0.010  |
| BMI                                                            | 0.97 | 0.93 - 1.01 | 0.02           | 0.159  |
| ED SOFA                                                        | 1.17 | 1.01 - 1.35 | 0.07           | 0.032  |
| Reason for mechanical ventilation                              |      |             |                |        |
| COPD                                                           | 1.48 | 0.27 - 8.23 | 0.88           | 0.657  |
| Sepsis                                                         | 0.91 | 0.35 - 2.37 | 0.49           | 0.850  |
| Trauma                                                         | 3.02 | 1.24 - 7.37 | 0.46           | 0.015  |
| ED RASS level                                                  | 0.77 | 0.63 - 0.95 | 0.11           | 0.016  |
| <b>Patients intubated in the ED (n= 317)</b>                   |      |             |                |        |
| Age                                                            | 1.01 | 0.98 - 1.03 | 0.01           | 0.567  |
| Vasopressor infusion                                           | 2.28 | 0.95 - 5.48 | 0.45           | 0.067  |
| ED SOFA                                                        | 1.14 | 0.99 - 1.30 | 0.07           | 0.064  |
| Malignancy                                                     | 3.22 | 1.34 - 7.73 | 0.45           | 0.009  |
| Reason for mechanical ventilation                              |      |             |                |        |
| COPD                                                           | 2.39 | 0.59 - 9.79 | 0.72           | 0.224  |
| Sepsis                                                         | 0.76 | 0.30 - 1.91 | 0.47           | 0.554  |
| Trauma                                                         | 2.12 | 0.75 - 6.01 | 0.53           | 0.157  |
| ED RASS level                                                  | 0.78 | 0.63 - 0.97 | 0.11           | 0.028  |
| ICU dexmedetomidine use                                        | 0.21 | 0.07 - 0.63 | 0.56           | 0.005  |

ED=emergency department, SOFA=sequential organ failure assessment, RASS=Richmond Agitation-Sedation Scale, COPD=chronic obstructive pulmonary disease, ICU=intensive care unit, BMI=body mass index, aOR=adjusted odds ratio, CI=confidence interval.

**e-Table 5.** Exploratory logistic regression models examining if any association existed between midazolam or propofol and survival to hospital discharge.

| Variables                               | aOR  | 95% CI      | P-value |
|-----------------------------------------|------|-------------|---------|
| Model 1 (including below variables 1-8) |      |             |         |
| ICU Propofol                            | 0.69 | 0.36 - 1.35 | 0.284   |
| ED RASS level                           | 0.75 | 0.61 - 0.92 | 0.005   |
| Model 2 (including below variables 1-8) |      |             |         |
| ICU Midazolam                           | 1.27 | 0.68 - 2.41 | 0.456   |
| ED RASS level                           | 0.75 | 0.61 - 0.92 | 0.005   |
| Model 3 (including below variables 1-8) |      |             |         |
| ICU Dexmedetomidine                     | 0.17 | 0.06 - 0.49 | 0.002   |
| ICU Propofol                            | 0.70 | 0.35 - 1.42 | 0.328   |
| ICU Midazolam                           | 1.43 | 0.75 - 2.74 | 0.280   |
| ED RASS level                           | 0.77 | 0.63 - 0.94 | 0.010   |
| Model 4 (including below variables 1-8) |      |             |         |
| ED Propofol                             | 0.80 | 0.40 - 1.61 | 0.537   |
| ED RASS level                           | 0.75 | 0.61 - 0.92 | 0.005   |
| Model 5 (including below variables 1-8) |      |             |         |
| ED Midazolam                            | 0.65 | 0.34 - 1.24 | 0.186   |
| ED RASS level                           | 0.75 | 0.61 - 0.92 | 0.005   |
| Model 6 (including below variables 1-8) |      |             |         |
| ICU Dexmedetomidine                     | 0.17 | 0.06 - 0.49 | 0.001   |
| ED Midazolam                            | 0.67 | 0.35 - 1.30 | 0.236   |
| ED RASS level                           | 0.77 | 0.63 - 0.94 | 0.010   |
| Model 7 (including below variables 1-8) |      |             |         |
| ICU Dexmedetomidine                     | 0.17 | 0.06 - 0.49 | 0.001   |
| ED Propofol                             | 0.81 | 0.40 - 1.64 | 0.563   |
| ED RASS level                           | 0.77 | 0.63 - 0.94 | 0.010   |

The original multivariable model reported in the manuscript (Table 3) included the following 8 variables: age, vasopressor infusion, malignancy, ED SOFA score, reason for mechanical ventilation (COPD, sepsis, trauma), and ED RASS level; along with ICU dexmedetomidine use (total of 9 variables). In these models, variables 1-8 from the original model were included in each analysis. We then combined several approaches in sequential fashion- substituting propofol or midazolam for dexmedetomidine, forcing all into the model, etc.

ED=emergency department, SOFA=sequential organ failure assessment, RASS=Richmond Agitation-Sedation Scale, COPD=chronic obstructive pulmonary disease, ICU=intensive care unit, aOR=adjusted odds ratio, CI=confidence interval.
